## Correction: Systematic review and meta-analysis comparing zoledronic acid administered at 12-week and 4-week intervals in patients with bone metastasis

Ling Cao<sup>1,\*</sup>, Yong-Jing Yang<sup>1,\*</sup>, Jian-Dong Diao<sup>2</sup>, Xu-He Zhang<sup>1</sup>, Yan-Ling Liu<sup>1</sup>, Bo-Yu Wang<sup>1</sup>, Zhi-Wen Li<sup>3</sup> and Shi-Xin Liu<sup>1</sup>

<sup>1</sup> Department of Radiation Oncology, Cancer Hospital of Jilin Province, Changchun 130012, People's Republic of China

<sup>2</sup> Department of Oncology and Hematology, China-Japan Union Hospital of Jilin University, Changchun 130012, People's Republic of China

<sup>3</sup> Department of Anesthesiology, The First Hospital of Jilin University, Changchun, Jilin, 130021, People's Republic of China

\* These authors contributed equally to this work

**Published:** August 14, 2018

**Copyright:** Cao et al. This is an open-access article distributed under the terms of the Creative Commons Attribution License 3.0 (CC BY 3.0), which permits unrestricted use, distribution, and reproduction in any medium, provided the original author and source are credited.

**This article has been corrected:** The correct affiliation is given below:

<sup>2</sup> Department of Oncology and Hematology, China-Japan Union Hospital of Jilin University, Changchun 130012, People's Republic of China

Original article: Oncotarget. 2017; 8:90308-90314. <https://doi.org/10.18632/oncotarget.19856>
